# Supplementary material for: Development of Phosphatized Calcium Carbonate Biominerals as Bioactive Bone Graft Substitute Materials, Part I: Incorporation of Magnesium and Strontium Ions
Source: MDPI journal article supplement (doi:10.3390/jfb9040069), 2018-12-02
Supplement: s1 [file s1]

## Supplementary material

### Development of phosphatized calcium carbonate biominerals as bioactive bone graft substitute materials, part I: incorporation of Mg and Sr ions

Ingo Sethmann <sup>1,\*</sup>, Cornelia Luft <sup>1,2</sup>, Hans-Joachim Kleebe <sup>1</sup>

<sup>1</sup> Institute of Applied Geosciences, Technische Universität Darmstadt, 64287 Darmstadt, Germany

<sup>2</sup> Institute of Geosciences, Johannes-Gutenberg-Universität, 55128 Mainz, Germany

\* Correspondence: ingo.sethmann@gmail.com

**Coral skeleton held in deionized water at 200°C for 168 h.**

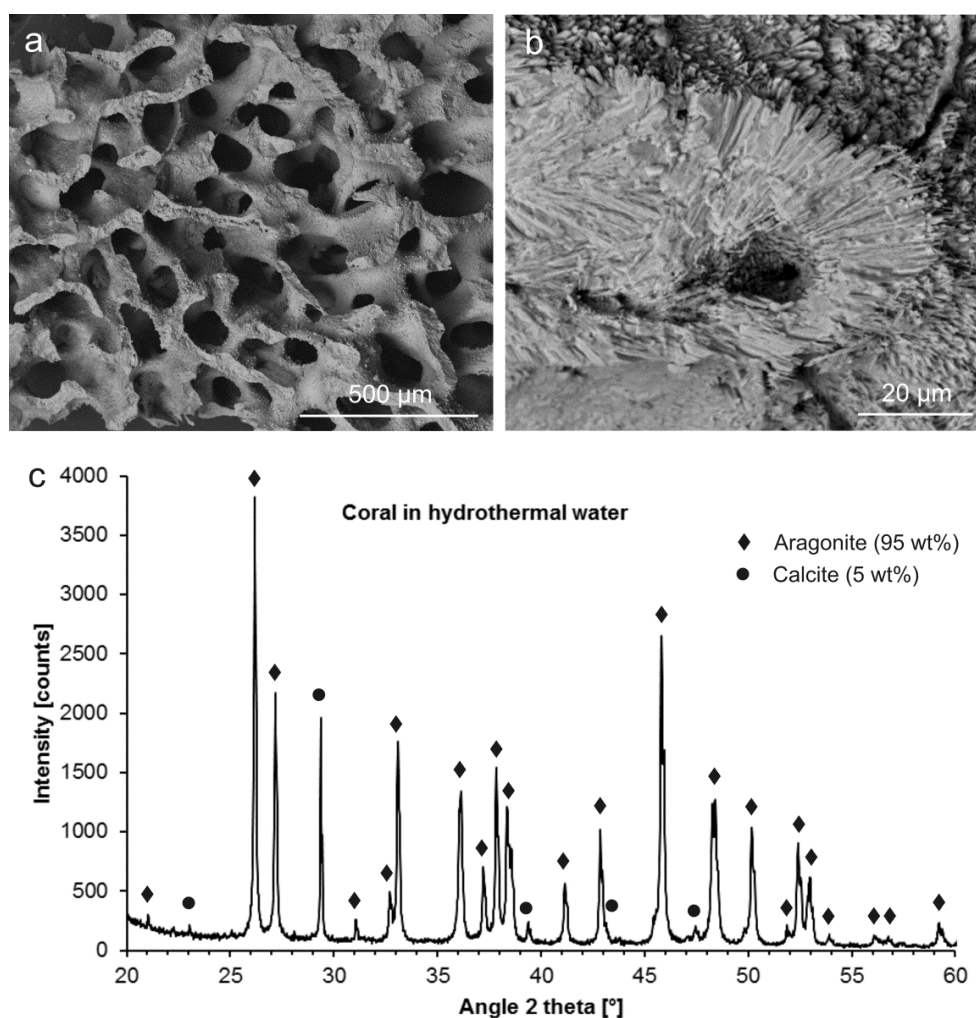

**Figure S1.** Coral skeleton held in deionized water at 200°C for 168 h. (a) Macromorphology and (b) internal microstructure of the material were preserved, while dissolution at the surface exposes the fibrous material; scanning electron microscopy (SEM), back-scattered electron images. (c) The hydrothermal treatment resulted in a partial replacement of the original aragonite (95 wt%; PDF 00-041-1475) by calcite (5 wt%; PDF 00-047-1743); X-ray diffractometry (XRD). XRD raw data S3: C30.
